# Supplementary material for: Effect of stoichiometry on crosslinked epoxy resin characteristics: structural heterogeneities, topological defects, properties, free volume and segmental mobility
Source: Royal Society of Chemistry journal article supplement (doi:10.1039/d1sm01825f), 2022-01-01
Supplement: d1sm01825f1.pdf [file d1sm01825f1.pdf]

Supporting information:  
Effect of stoichiometry on crosslinked epoxy resin characteristics:  
Structural heterogeneities, topological defects, properties, free  
volume and segmental mobilities

Arun Srikanth Sridhar<sup>a</sup>

<sup>a</sup>Department of fiber and polymer technology, The Royal Institute of Technology ( KTH ),  
10044 Stockholm, Sweden

## Contents

|                                                                                           |           |
|-------------------------------------------------------------------------------------------|-----------|
| <b>S1 Estimation of <math>T_g</math></b>                                                  | <b>6</b>  |
| <b>S2 Regression models used for estimating missing properties from experimental data</b> | <b>19</b> |
| <b>S3 Data availability</b>                                                               | <b>22</b> |

## List of Figures

|     |                                                                                                                                                                                                                                                                                                                         |    |
|-----|-------------------------------------------------------------------------------------------------------------------------------------------------------------------------------------------------------------------------------------------------------------------------------------------------------------------------|----|
| S1  | Chemical reaction between epoxy and amine precursors (a) primary amine reaction (b) secondary amine reaction. (c) etherification . . . . .                                                                                                                                                                              | 3  |
| S2  | Partial atomic charges that were reassigned when a secondary amine was formed. . . . .                                                                                                                                                                                                                                  | 4  |
| S3  | Partial atomic charges that were reassigned when a tertiary amine was formed. . . . .                                                                                                                                                                                                                                   | 4  |
| S4  | Average density as a function of temperature. Uncertainties are smaller than the symbols . .                                                                                                                                                                                                                            | 5  |
| S5  | Volume as a function temperature for the systems studied. The black lines represent the linear fit to the rubbery and glassy regime. . . . .                                                                                                                                                                            | 5  |
| S6  | Illustration of $T_g$ estimation procedure. $(\bar{T}_{gl}, \bar{\rho}_{gl})$ and $(\bar{T}_r, \bar{\rho}_r)$ are the centroids of the glassy line segment (red) and the rubbery line segment (blue) respectively. $T$ is the temperature, $\rho$ is the density and $T_g$ is the glass transition temperature. . . . . | 7  |
| S7  | C-N bonds created at each cure iteration in $R=0.4$ samples . . . . .                                                                                                                                                                                                                                                   | 8  |
| S8  | C-N bonds created at each cure iteration in $R=0.67$ samples . . . . .                                                                                                                                                                                                                                                  | 9  |
| S9  | C-N bonds created at each cure iteration in $R=1$ samples . . . . .                                                                                                                                                                                                                                                     | 10 |
| S10 | C-N bonds created at each cure iteration in $R=2$ samples . . . . .                                                                                                                                                                                                                                                     | 11 |
| S11 | C-N bonds created at each cure iteration in $R=3$ samples . . . . .                                                                                                                                                                                                                                                     | 12 |
| S12 | Concentration profiles of functional groups during cure in $R=0.4$ samples. The green line represents the first order kinetic fit to secondary amine evolution. . . . .                                                                                                                                                 | 13 |

|     |                                                                                                                                                                                                                                                                         |    |
|-----|-------------------------------------------------------------------------------------------------------------------------------------------------------------------------------------------------------------------------------------------------------------------------|----|
| S13 | Concentration profiles of functional groups during cure in $R=0.67$ samples. The green line represents the first order kinetic fit to secondary amine evolution. . . . .                                                                                                | 13 |
| S14 | Concentration profiles of functional groups during cure in $R=1$ samples. The green line represents the first order kinetic fit to secondary amine evolution. . . . .                                                                                                   | 14 |
| S15 | Concentration profiles of functional groups during cure in $R=2$ samples. The green line represents the first order kinetic fit to secondary amine evolution. . . . .                                                                                                   | 15 |
| S16 | Concentration profiles of functional groups during cure in $R=3$ samples. The green line represents the first order kinetic fit to secondary amine evolution. . . . .                                                                                                   | 15 |
| S17 | Sum of the squared errors as a function of $\overline{k_2/k_1}$ for the systems studied . . . . .                                                                                                                                                                       | 16 |
| S18 | Experimental data on $\rho_{300}$ (room temperature density) as a function of amine composition (reprinted here with permission from reference [1], copyright 1999 John Wiley & Sons). . . .                                                                            | 18 |
| S19 | Experimental data on linear thermal expansion coefficient in the rubbery state $\alpha_{rl}$ as a function of amine composition (reprinted here with permission from reference [2], copyright 1992 John Wiley & Sons). . . . .                                          | 19 |
| S20 | Fractional free volume as a function of temperature for the systems studied. . . . .                                                                                                                                                                                    | 21 |
| S21 | Average fractional free volume as a function of temperature for the systems studied. The temperature range over which crossover in the trend i.e., increase in fractional volume to decrease in fractional volume, for deviations from $R=1$ , occurs is shown. . . . . | 22 |
| S22 | Experimental data on linear thermal expansion coefficient in the rubbery state $\alpha_{rl}$ as a function of amine composition (reprinted here with permission from reference [2], copyright 1992 John Wiley & Sons). . . . .                                          | 22 |

## List of Tables

|     |                                                                                                                                                                                                                                                                                                                                                                                                                                                                                                                                                                         |    |
|-----|-------------------------------------------------------------------------------------------------------------------------------------------------------------------------------------------------------------------------------------------------------------------------------------------------------------------------------------------------------------------------------------------------------------------------------------------------------------------------------------------------------------------------------------------------------------------------|----|
| S1  | Formulations studied in this work . . . . .                                                                                                                                                                                                                                                                                                                                                                                                                                                                                                                             | 3  |
| S2  | Temperature ranges used for the estimation of $T_g$ and CVTEs . . . . .                                                                                                                                                                                                                                                                                                                                                                                                                                                                                                 | 17 |
| S3  | Simulation box specifications: $\times$ stands for crosslinking. The simulation box is cubic. Uncertainties in box lengths are negligible. . . . .                                                                                                                                                                                                                                                                                                                                                                                                                      | 17 |
| S4  | Monomer types in $R=0.4$ system. . . . .                                                                                                                                                                                                                                                                                                                                                                                                                                                                                                                                | 17 |
| S5  | Monomer types in $R=0.67$ system. . . . .                                                                                                                                                                                                                                                                                                                                                                                                                                                                                                                               | 17 |
| S6  | Monomer types in $R=2$ system. . . . .                                                                                                                                                                                                                                                                                                                                                                                                                                                                                                                                  | 17 |
| S7  | Monomer types in $R=3$ system. . . . .                                                                                                                                                                                                                                                                                                                                                                                                                                                                                                                                  | 18 |
| S8  | Experimental data on room temperature density $\rho_{300}$ and glass transition temperature $T_g$ . The values of $T_g$ were taken from reference [1]. The density data were extracted from Fig. S18 using a graphical extraction tool [3]. The amine composition in pph was converted to an equivalent amine-to-epoxy ratio $R$ using the relation, $r = \frac{2M_E}{M_A} \frac{w_a}{w_e}$ , where $M_E$ and $M_A$ are the molecular weight of epoxy (375 g/mol) and amine respectively and $\frac{w_a}{w_e}$ is the amine-to-epoxy weight ratio (pph amine) . . . . . | 18 |
| S9  | Experimental values of $\alpha_{rl}$ . The data were extracted from Fig. S22 using a graphical extraction tool [3]. . . . .                                                                                                                                                                                                                                                                                                                                                                                                                                             | 19 |
| S10 | Comparison of material properties determined from MD simulations (Sim.) and experimental data (Exp.) from literature. The experimental values of material properties of off-stoichiometric systems ( $R \neq 1$ ) were obtained (estimated) using regression models. . . . .                                                                                                                                                                                                                                                                                            | 20 |

- S11 The adjusted values of  $T_g$  based on shift estimated using WLF equation,  $T_g^{WLF}$  and heuristic approach,  $T_g^{heuristic}$  and the estimated experimental values of  $T_g$  calculated from regression model,  $T_g^{exp*}$  (same as in Table. S10, listed here for ease of comparison) . . . . . 20
- S12 Volume fraction of defects,  $\phi_{Def}$  at 300 K, weight fraction of defects,  $w_{Def}$  and weight fraction of sols,  $w_{sol}$ . . . . . 20

| Amine composition (wt%) | $R$ amine:epoxy | Molecules DGEBA:PACM |
|-------------------------|-----------------|----------------------|
| 10.88                   | 0.4             | 540:108              |
| 16.91                   | 0.67            | 480:160              |
| 23.39                   | 1               | 432:216              |
| 37.91                   | 2               | 343:343              |
| 47.81                   | 3               | 280:420              |

Table S1: Formulations studied in this work

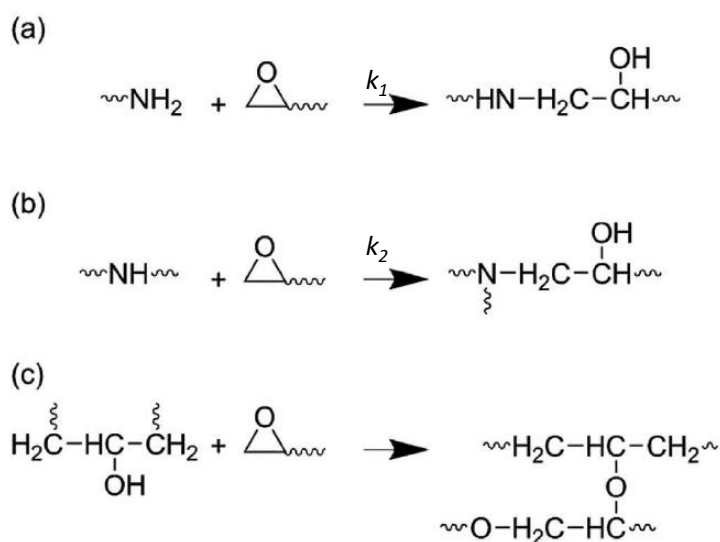

Figure S1: Chemical reaction between epoxy and amine precursors (a) primary amine reaction (b) secondary amine reaction. (c) etherification

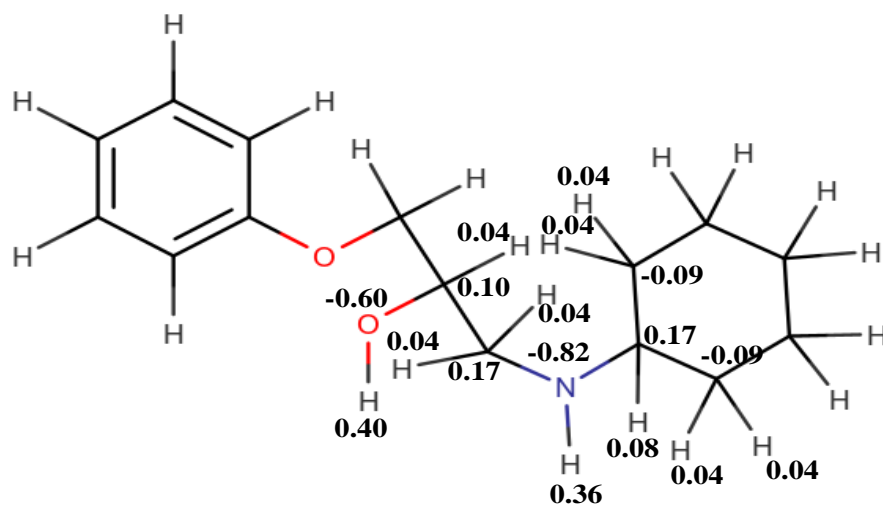

Figure S2: Partial atomic charges that were reassigned when a secondary amine was formed.

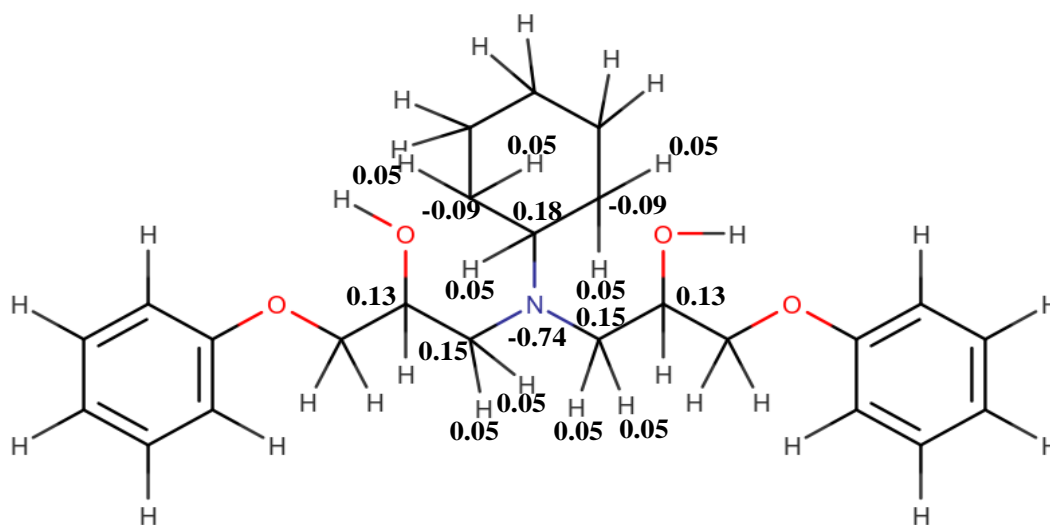

Figure S3: Partial atomic charges that were reassigned when a tertiary amine was formed.

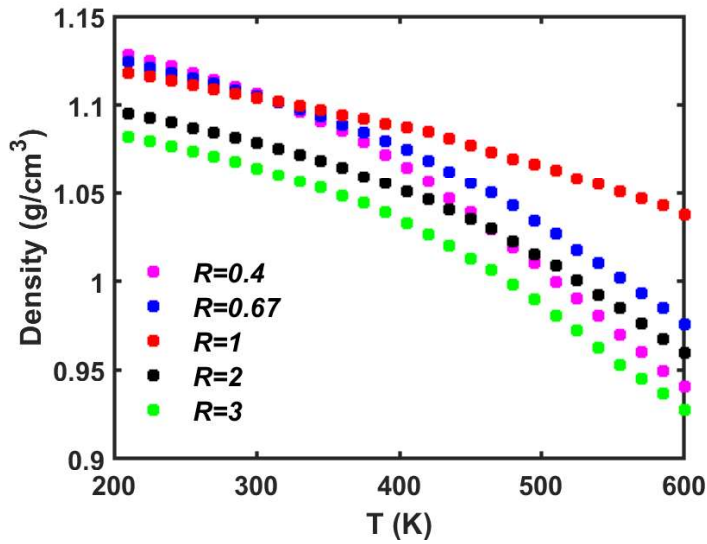

Figure S4: Average density as a function of temperature. Uncertainties are smaller than the symbols

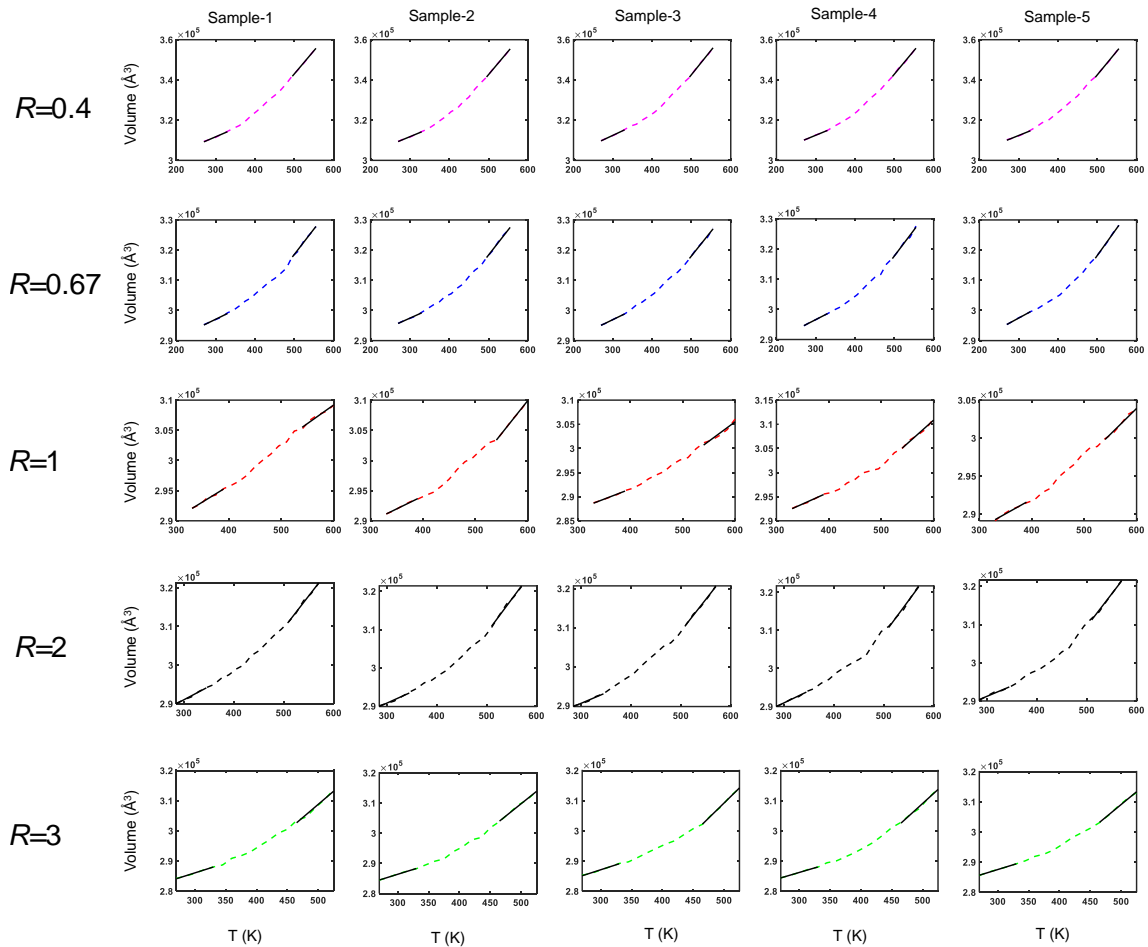

Figure S5: Volume as a function temperature for the systems studied. The black lines represent the linear fit to the rubbery and glassy regime.

## S1 Estimation of $T_g$

Let  $(T_{gl}, \rho_{gl})$  and  $(T_r, \rho_r)$  represent a point in the glassy regime and rubbery regime respectively (see Fig. S6). The equation of a line segment in the glassy regime can then be written as

$$\rho_{gl} = \bar{\rho}_{gl} + b_{gl}(T_{gl} - \bar{T}_{gl}) \quad (1)$$

and similarly a line segment in the rubbery regime can be written as

$$\rho_r = \bar{\rho}_r + b_r(T_r - \bar{T}_r) \quad (2)$$

where  $(\bar{T}_{gl}, \bar{\rho}_{gl})$  and  $(\bar{T}_r, \bar{\rho}_r)$  are the centroids of the glassy line segment and the rubbery line segment respectively .

The abscissa of the point of intersection of the two segments given by Eq. 1 and Eq. 2 is then taken to be the  $T_g$  and is given by

$$T_g = -\frac{\bar{\rho}_{gl} - \bar{\rho}_r + b_{gl}\bar{T}_{gl} - \bar{b}_r\bar{T}_r}{b_{gl} - b_r} = -\frac{\Delta a}{\Delta b} \quad (3)$$

The four parameters used in the two line segments (Eq. 1 and Eq. 2),  $\bar{\rho}_{gl}$ ,  $\bar{\rho}_r$ ,  $b_{gl}$ ,  $b_r$  are then computed using the equations derived from weighted least squares (WLS) procedure. For brevity, the subscripts  $r$  and  $gl$  that distinguish the parameters of the rubbery and glassy line segments respectively are dropped in the following equations but is understood to apply to all quantities evaluated.

$$b = \frac{S_{\rho T}}{S_{TT}} \quad (4)$$

$$S_{\rho T} = \sum_i w_i (T - \bar{T})(\rho - \bar{\rho}) \quad (5)$$

$$S_{TT} = \sum_i w_i (T - \bar{T})^2 \quad (6)$$

$$\bar{\rho} = \frac{\sum_i w_i \rho_i}{\sum_i w_i} \quad (7)$$

$$w_i = \frac{1}{Var(\rho_i)} \quad (8)$$

$$\bar{T} = \frac{\sum_i w_i T_i}{\sum_i w_i} \quad (9)$$

$$Var(b) = \frac{1}{S_{TT}} \quad (10)$$

$$Var(\bar{\rho}) = \frac{1}{\sum_i w_i} \quad (11)$$

The sums were taken over the number of data points in the glassy or rubbery regime, as appropriate. The  $Var(\rho)$  is the square of the standard deviation of the average density of five independent samples.

Estimating uncertainty (standard deviation) in glass transition temperature  $S_{T_g}$  amounts to estimating the uncertainty in the intersection region of the two linear segments. A procedure that is frequently used in the field of titrimetry was used for this purpose [4]. The assumptions involved in this procedure are discussed in detail in literature [5, 4]. The uncertainty in  $T_g$  is calculated as,

$$S_{T_g} = \sqrt{\text{Var}(T_g)} \quad (12)$$

and  $\text{Var}(T_g)$  is given by,

$$\text{Var}(T_g) = [\text{Var}(\bar{\rho}_{gl}) + \text{Var}(\bar{\rho}_r) + \sum_j (\bar{T}_j^2 - 2\bar{T}_j T_g + T_g^2) \text{Var}(b_j)] / \Delta b^2 \quad (13)$$

where  $\sum_j$  implies a sum of two terms, one with subscript  $j=r$  and one with  $j=gl$ .

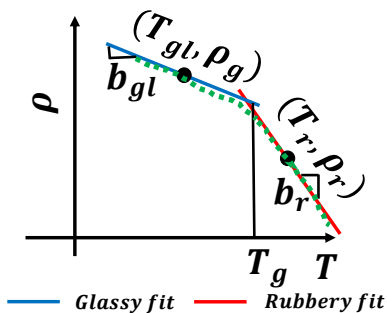

Figure S6: Illustration of  $T_g$  estimation procedure.  $(\bar{T}_{gl}, \bar{\rho}_{gl})$  and  $(\bar{T}_r, \bar{\rho}_r)$  are the centroids of the glassy line segment (red) and the rubbery line segment (blue) respectively.  $T$  is the temperature,  $\rho$  is the density and  $T_g$  is the glass transition temperature.

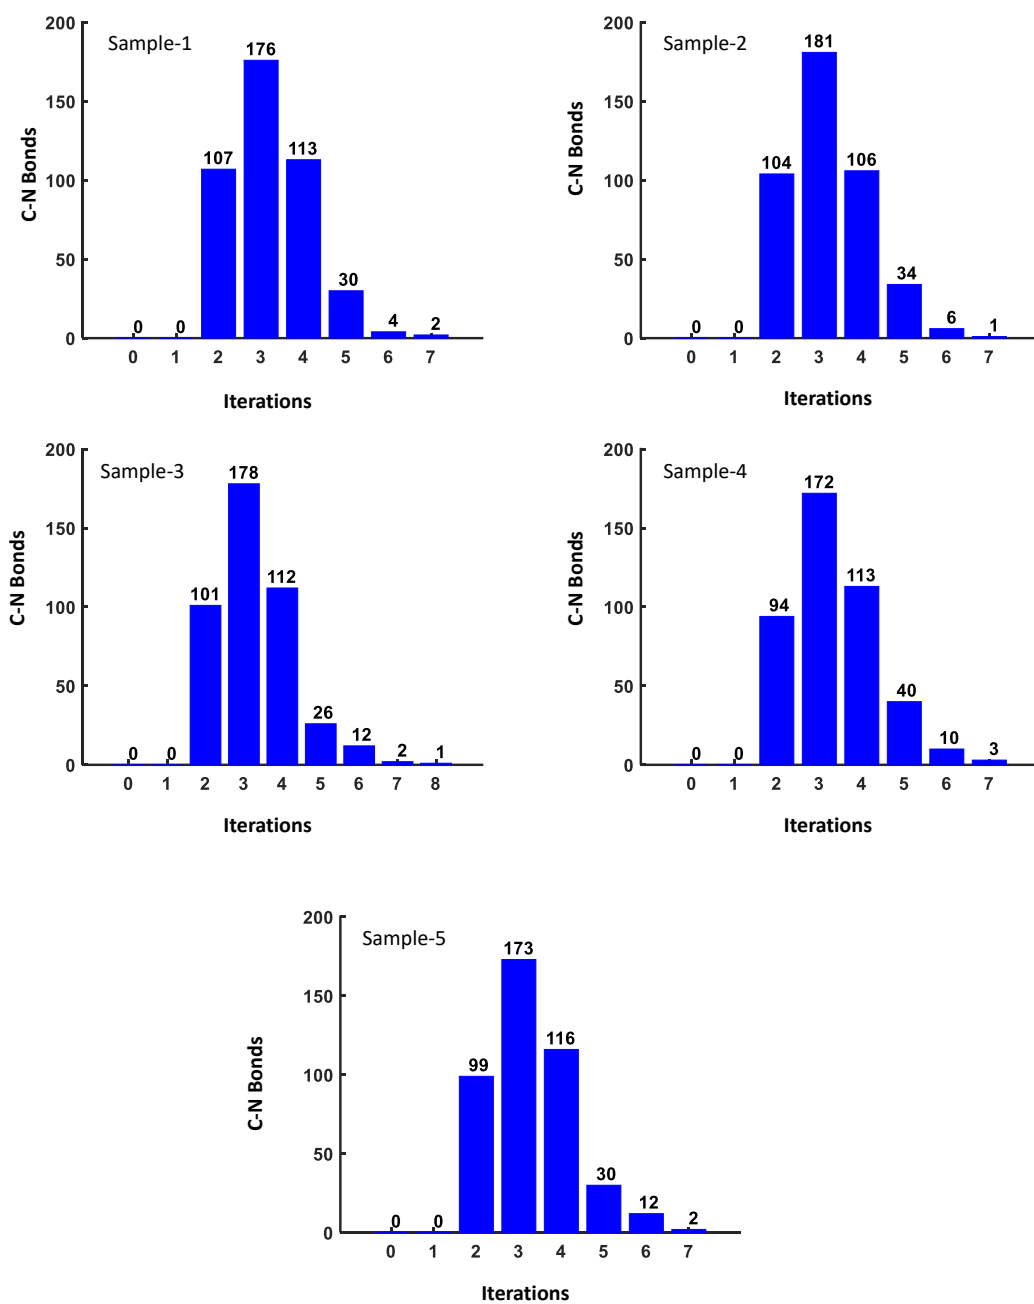

Figure S7: C-N bonds created at each cure iteration in  $R=0.4$  samples



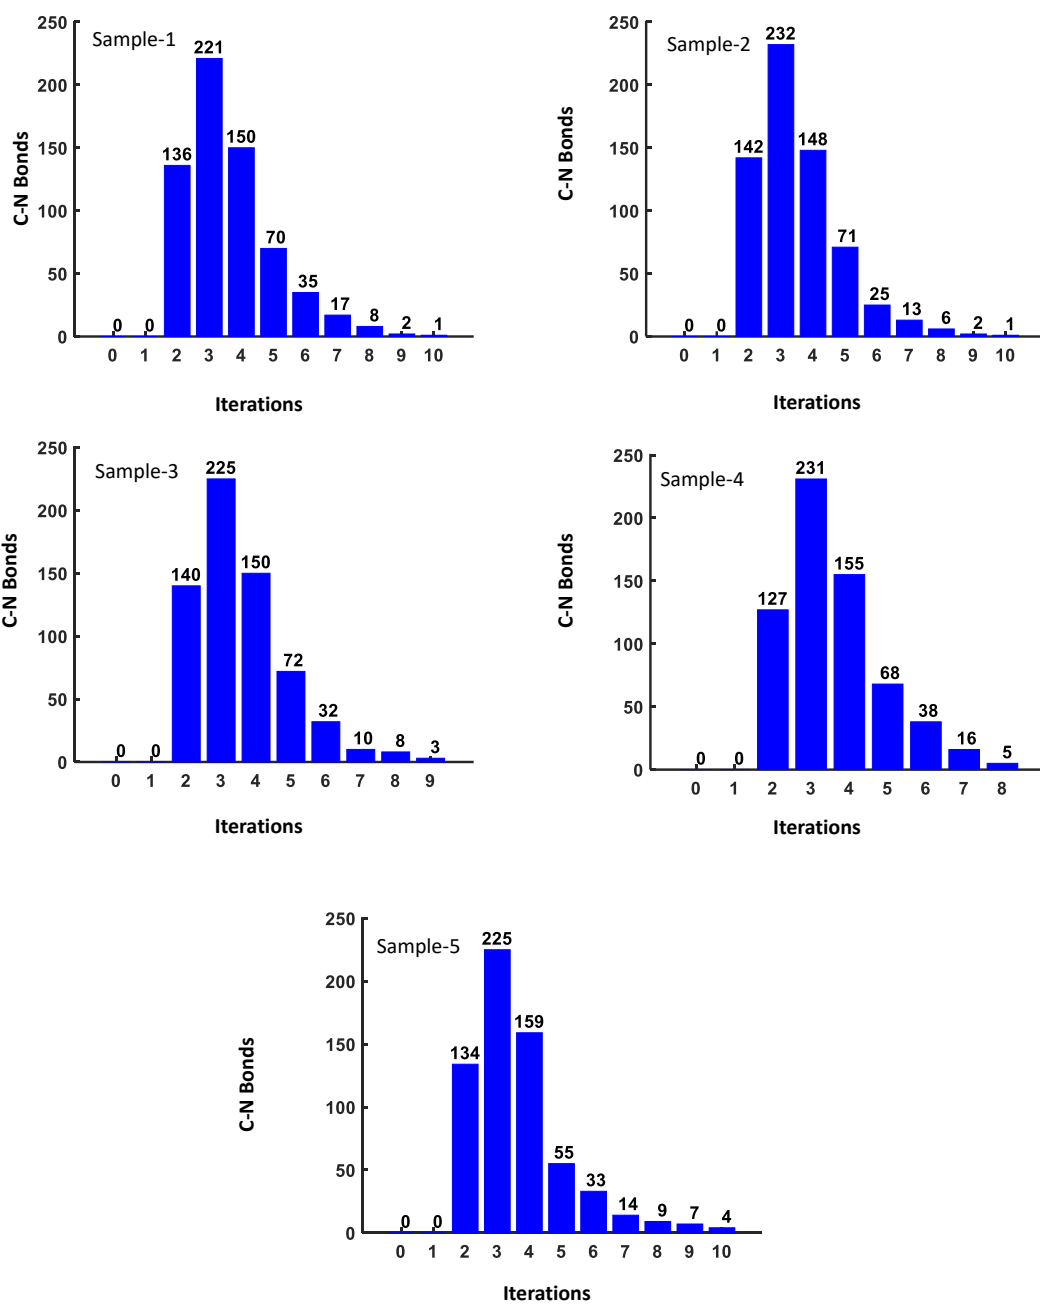

Figure S8: C-N bonds created at each cure iteration in  $R=0.67$  samples

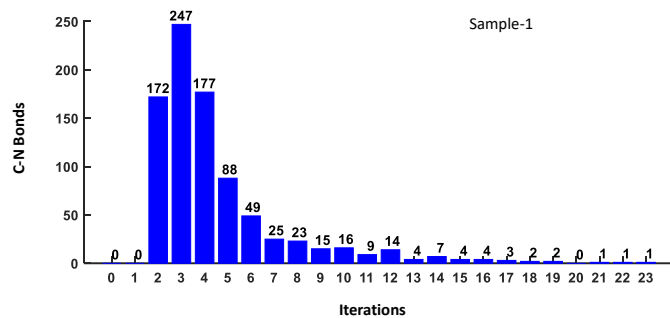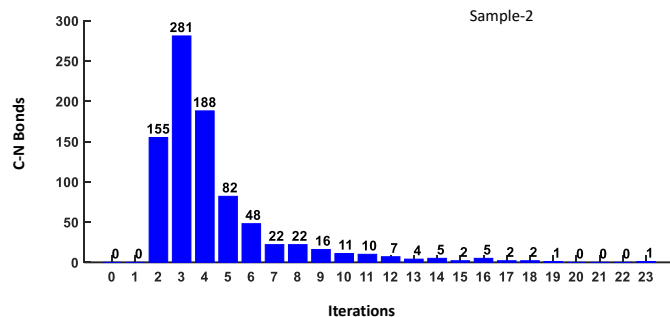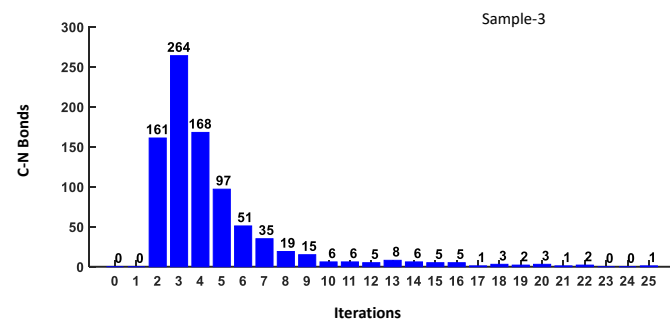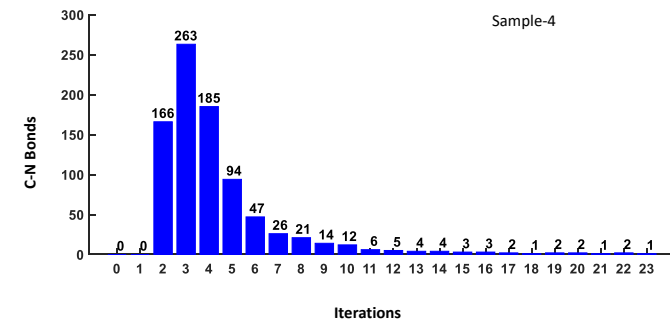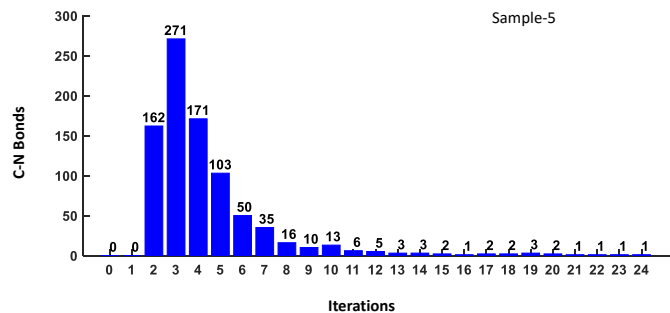

Figure S9: C-N bonds created at each cure iteration in  $R=1$  samples

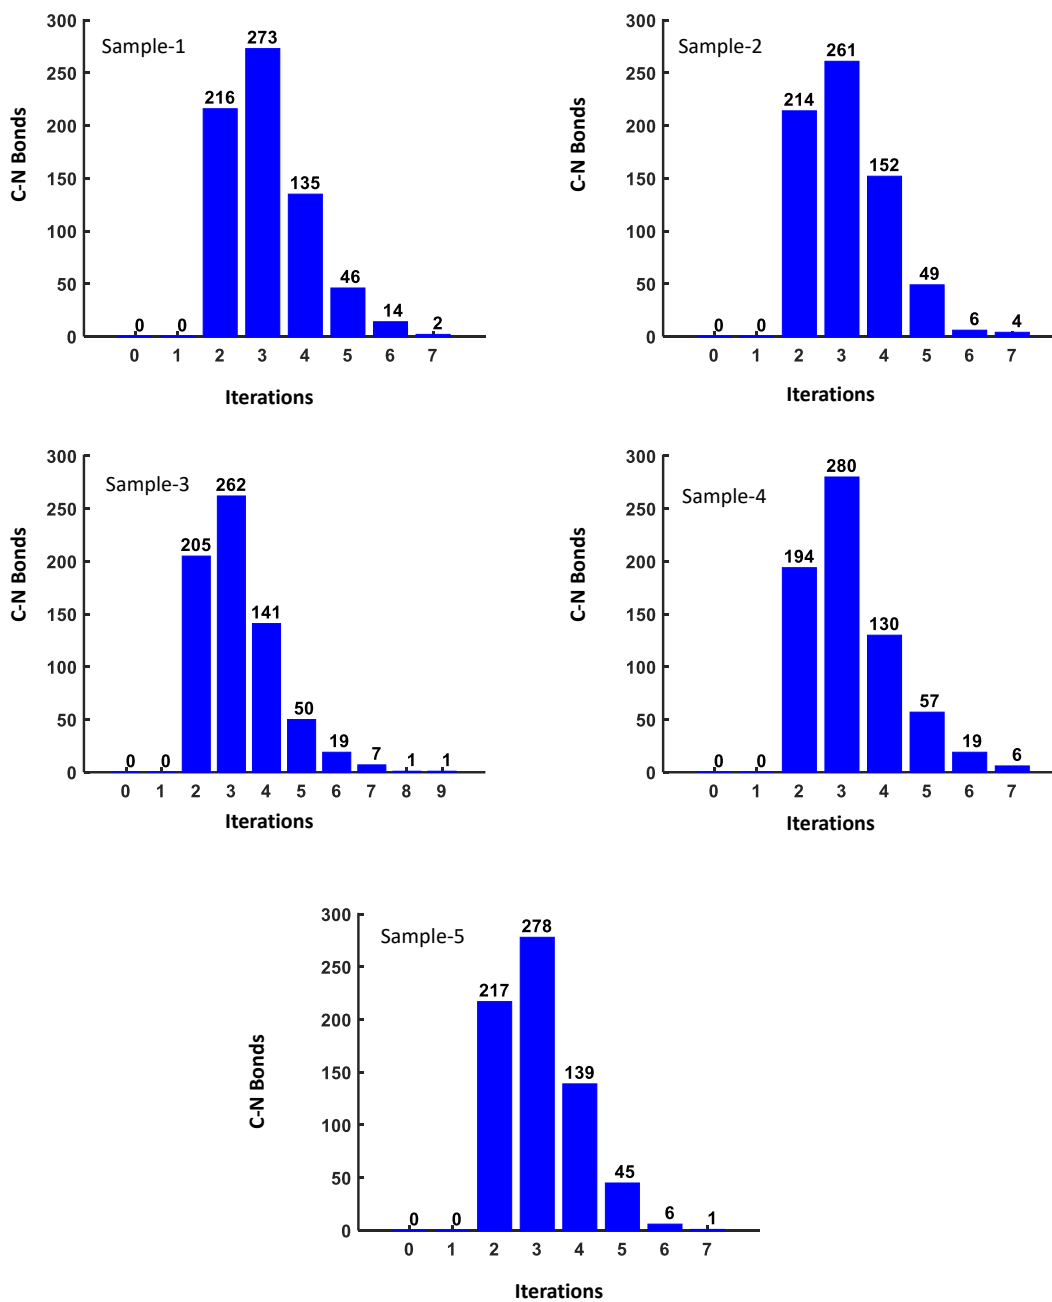

Figure S10: C-N bonds created at each cure iteration in  $R=2$  samples

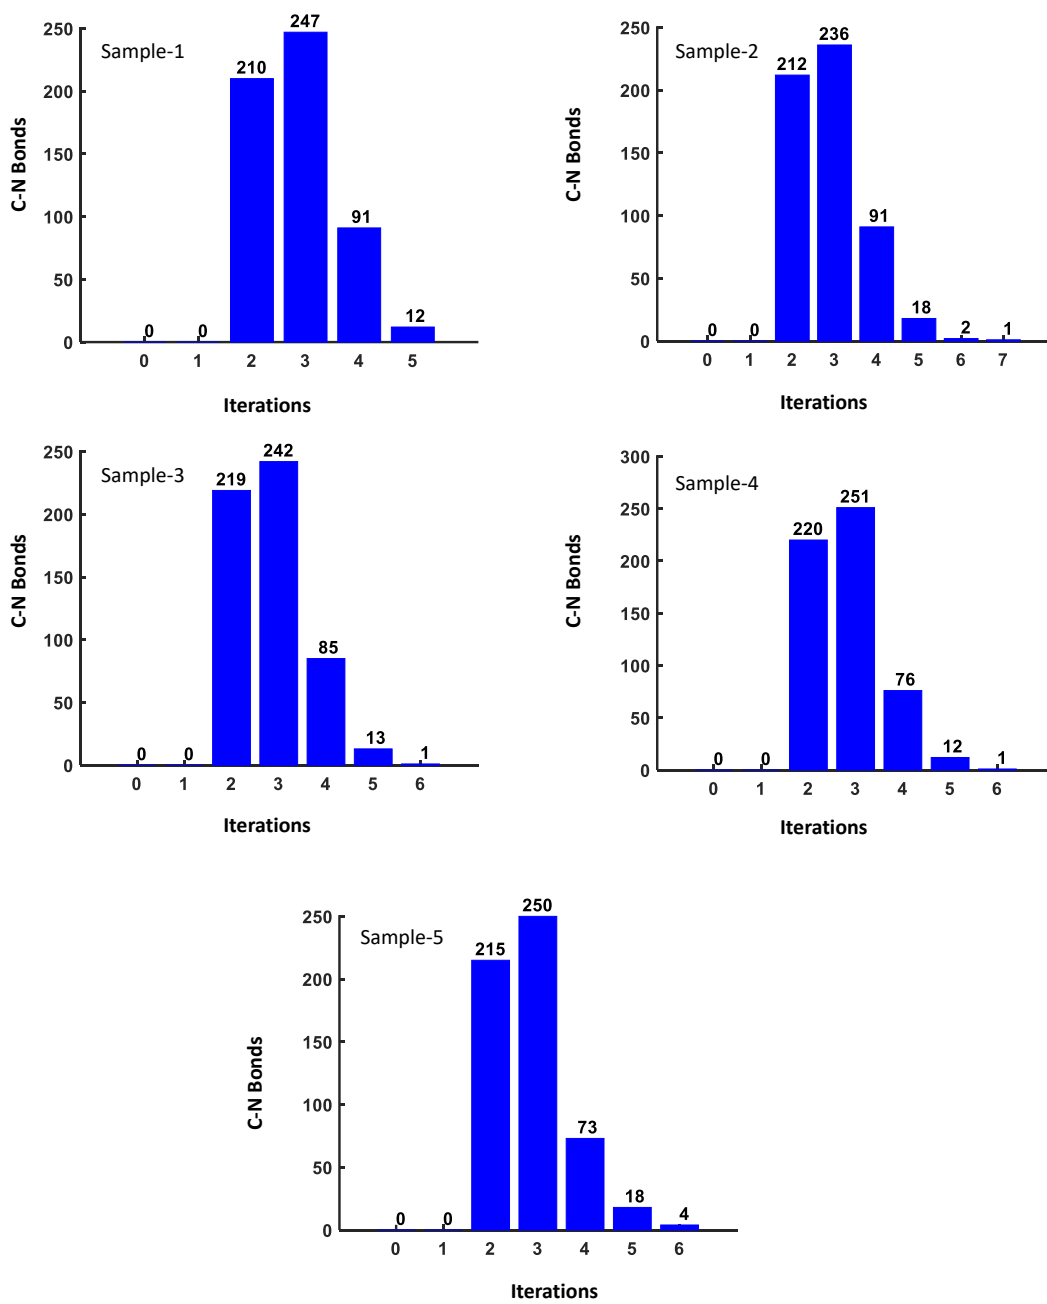

Figure S11: C-N bonds created at each cure iteration in  $R=3$  samples

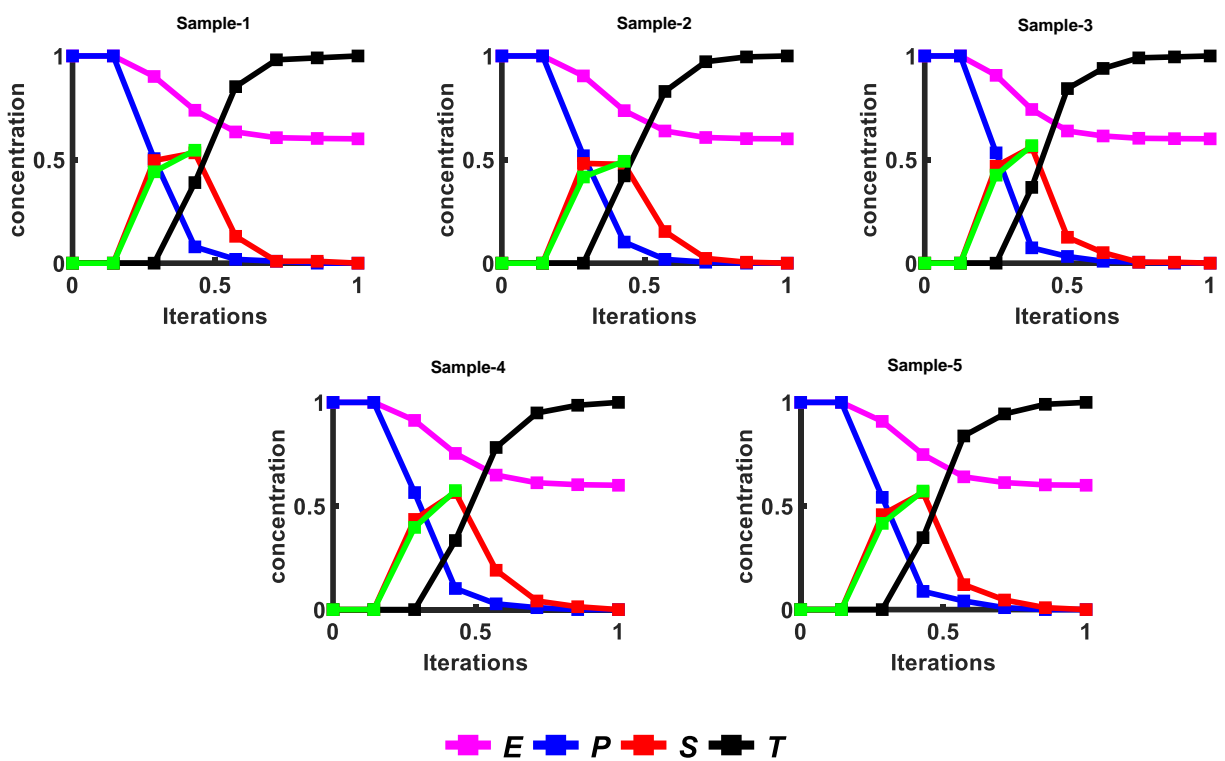

Figure S12: Concentration profiles of functional groups during cure in  $R=0.4$  samples. The green line represents the first order kinetic fit to secondary amine evolution.

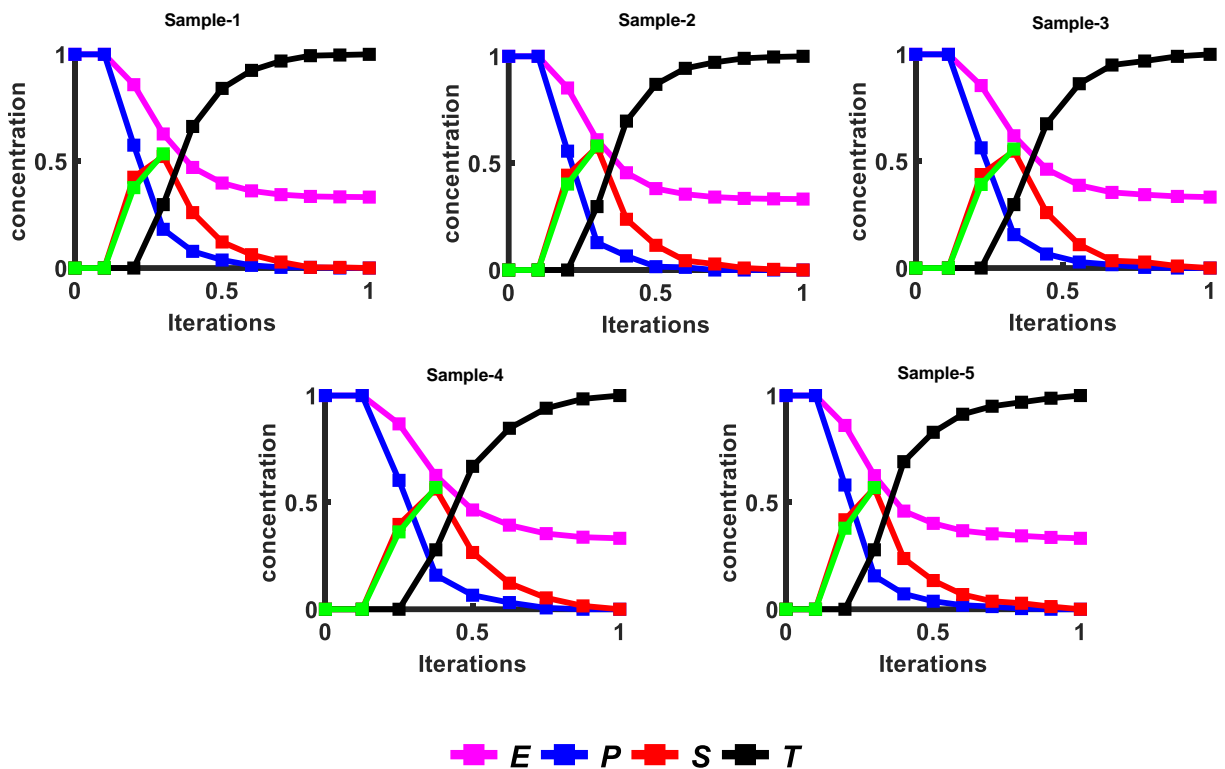

Figure S13: Concentration profiles of functional groups during cure in  $R=0.67$  samples. The green line represents the first order kinetic fit to secondary amine evolution.

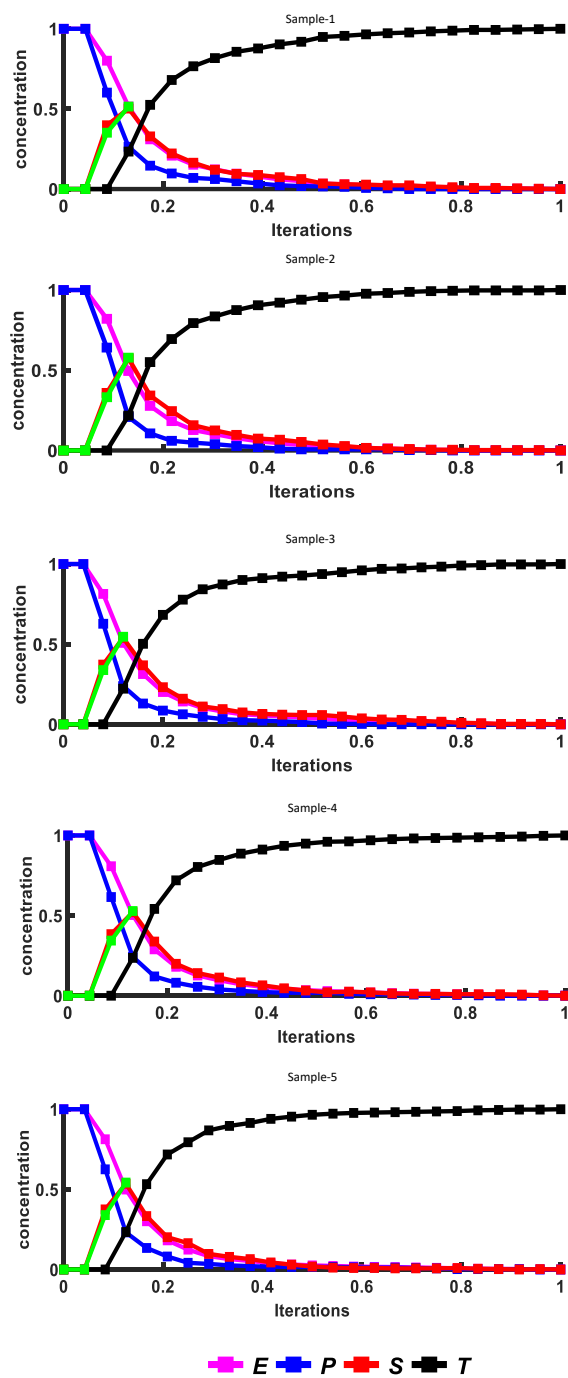

Figure S14: Concentration profiles of functional groups during cure in  $R=1$  samples. The green line represents the first order kinetic fit to secondary amine evolution.

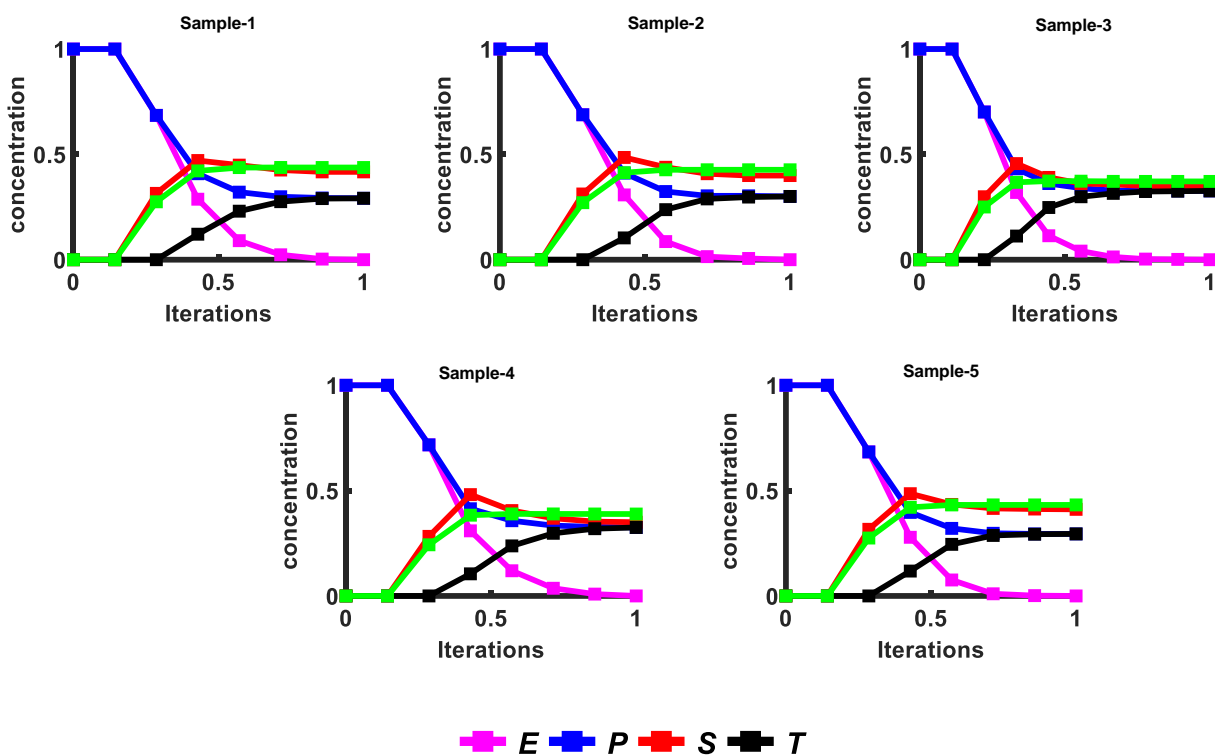

Figure S15: Concentration profiles of functional groups during cure in  $R=2$  samples. The green line represents the first order kinetic fit to secondary amine evolution.

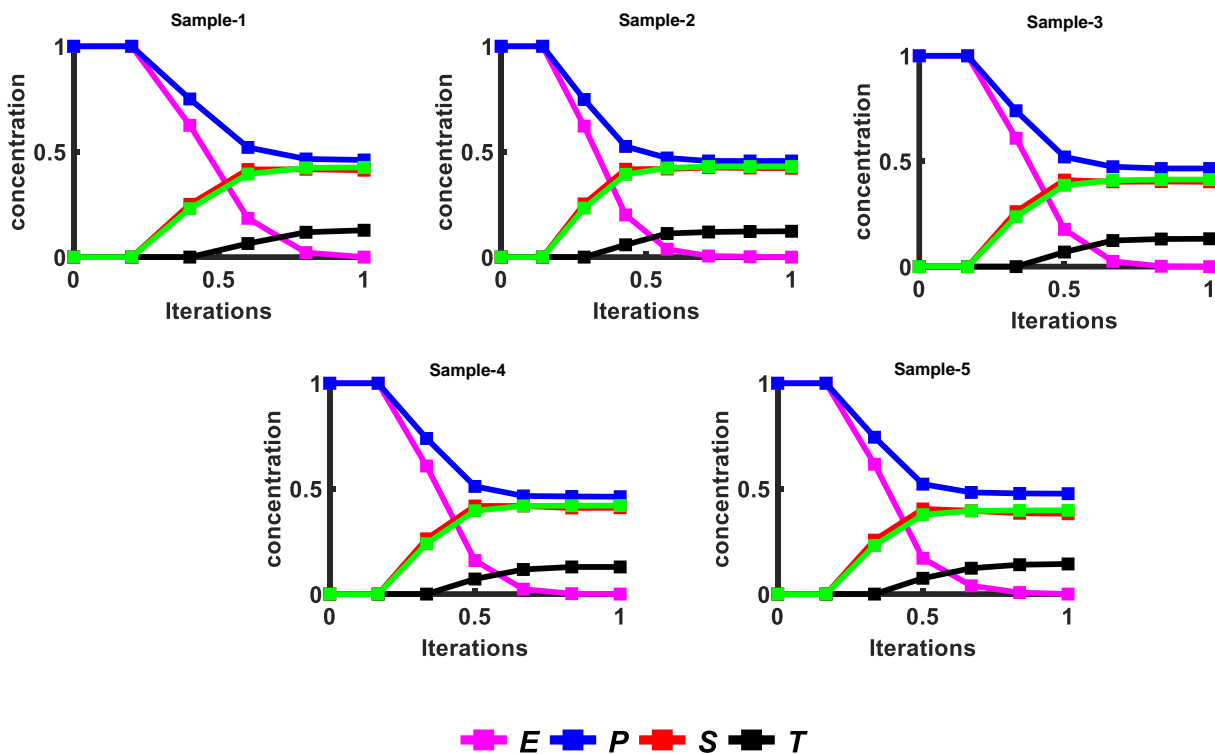

Figure S16: Concentration profiles of functional groups during cure in  $R=3$  samples. The green line represents the first order kinetic fit to secondary amine evolution.

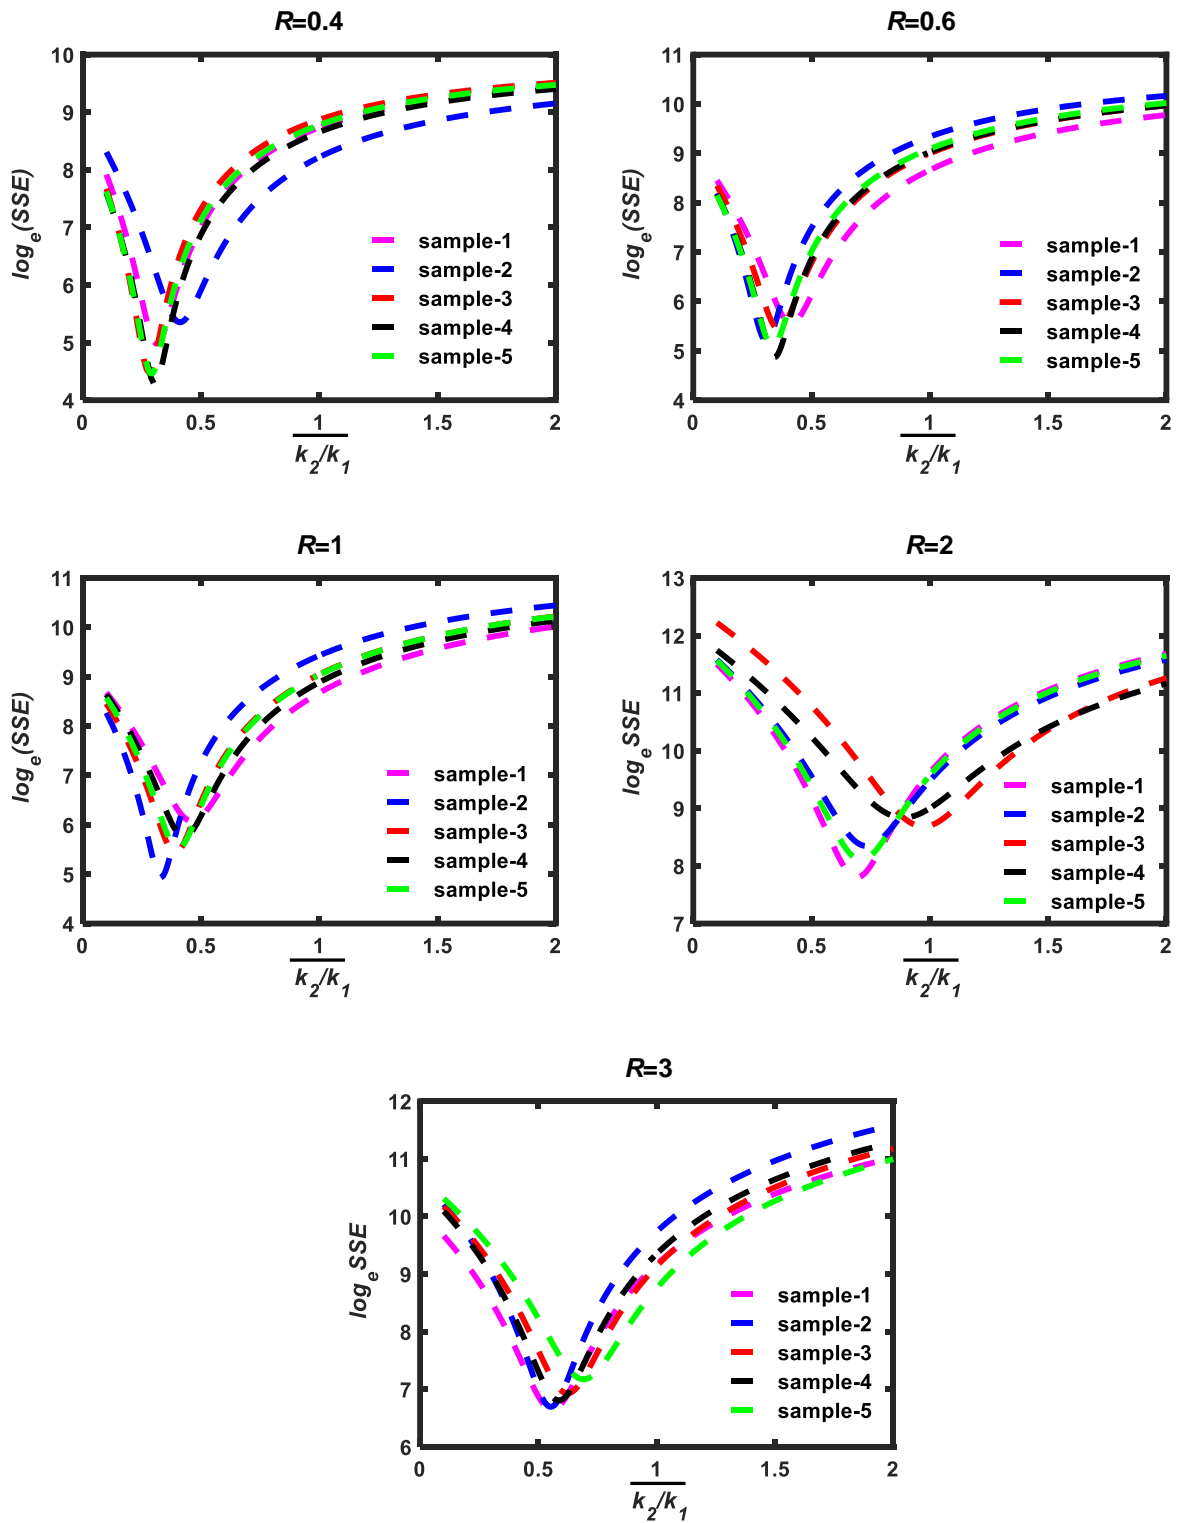

Figure S17: Sum of the squared errors as a function of  $\overline{k_2/k_1}$  for the systems studied



| System   | Glassy range  | Rubbery range |
|----------|---------------|---------------|
| $R=0.4$  | 270 K - 330 K | 495 K - 555 K |
| $R=0.67$ | 270 K - 330 K | 495 K - 555 K |
| $R=1$    | 330 K - 390 K | 540 K - 600 K |
| $R=2$    | 285 K - 345 K | 510 K - 570 K |
| $R=3$    | 270 K - 330 K | 465 K - 525 K |

Table S2: Temperature ranges used for the estimation of  $T_g$  and CVTEs

| System   | # of atoms before $\times$ | # of atoms after $\times$ | Box edge length ( $\text{\AA}$ ) at 210 K |
|----------|----------------------------|---------------------------|-------------------------------------------|
| $R=0.4$  | 33048                      | 32184                     | 67.361                                    |
| $R=0.67$ | 32000                      | 30720                     | 66.34                                     |
| $R=1$    | 31752                      | 30024                     | 65.87                                     |
| $R=2$    | 32242                      | 30870                     | 65.91                                     |
| $R=3$    | 32060                      | 30940                     | 65.56                                     |

Table S3: Simulation box specifications:  $\times$  stands for crosslinking. The simulation box is cubic. Uncertainties in box lengths are negligible.

| Sample | $E_0$ | $E_1$ | $E_2$ | $A_0$ |
|--------|-------|-------|-------|-------|
| 1      | 81    | 270   | 189   | 108   |
| 2      | 93    | 246   | 201   | 108   |
| 3      | 90    | 252   | 198   | 108   |
| 4      | 96    | 240   | 204   | 108   |
| 5      | 92    | 248   | 200   | 108   |

Table S4: Monomer types in  $R=0.4$  system.

| Sample | $E_0$ | $E_1$ | $E_2$ | $A_0$ |
|--------|-------|-------|-------|-------|
| 1      | 229   | 182   | 69    | 160   |
| 2      | 221   | 198   | 61    | 160   |
| 3      | 226   | 188   | 66    | 160   |
| 4      | 224   | 192   | 64    | 160   |
| 5      | 224   | 192   | 64    | 160   |

Table S5: Monomer types in  $R=0.67$  system.

| Sample | $E_0$ | $A_0$ | $A_1$ | $A_2$ | $A_{2'}$ | $A_3$ | $A_4$ |
|--------|-------|-------|-------|-------|----------|-------|-------|
| 1      | 343   | 40    | 76    | 60    | 44       | 90    | 33    |
| 2      | 343   | 33    | 92    | 55    | 48       | 72    | 43    |
| 3      | 343   | 50    | 75    | 40    | 49       | 83    | 46    |
| 4      | 343   | 50    | 70    | 43    | 53       | 84    | 43    |
| 5      | 343   | 40    | 73    | 63    | 49       | 83    | 35    |

Table S6: Monomer types in  $R=2$  system.

| Sample | $E_0$ | $A_0$ | $A_1$ | $A_2$ | $A_{2'}$ | $A_3$ | $A_4$ |
|--------|-------|-------|-------|-------|----------|-------|-------|
| 1      | 280   | 9     | 44    | 65    | 45       | 172   | 85    |
| 2      | 280   | 8     | 45    | 83    | 42       | 143   | 99    |
| 3      | 280   | 8     | 44    | 60    | 51       | 174   | 83    |
| 4      | 280   | 8     | 42    | 76    | 50       | 150   | 94    |
| 5      | 280   | 8     | 46    | 66    | 58       | 142   | 100   |

Table S7: Monomer types in  $R=3$  system.

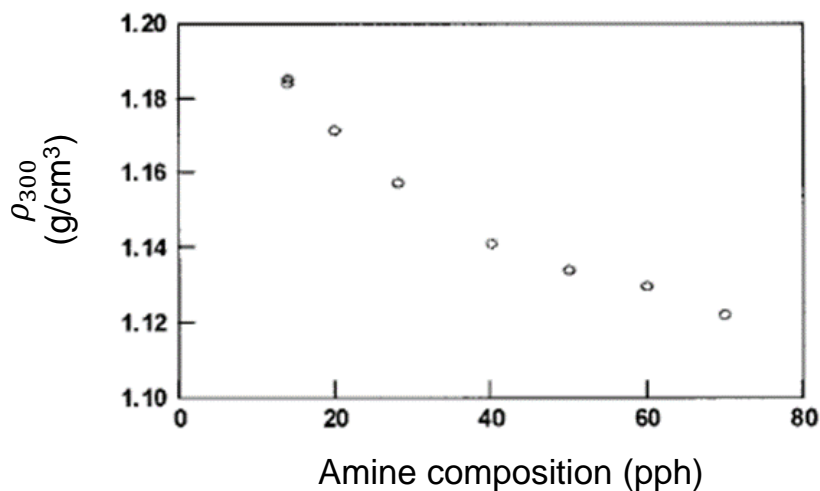

Figure S18: Experimental data on  $\rho_{300}$  (room temperature density) as a function of amine composition (reprinted here with permission from reference [1], copyright 1999 John Wiley & Sons.).

| $R$  | Amine composition (pph) | $T_g$ ( $^{\circ}\text{C}$ ) | $\rho_{300}$ (g/cm <sup>3</sup> ) |
|------|-------------------------|------------------------------|-----------------------------------|
| 0.51 | 14.3                    | 65                           | 1.183                             |
| 0.70 | 19.8                    | 88                           | 1.171                             |
| 1    | 28.4                    | 161                          | 1.157                             |
| 1.44 | 40.6                    | 120                          | 1.140                             |
| 1.79 | 50.2                    | 106                          | 1.133                             |
| 2.16 | 60.6                    | 91                           | 1.129                             |
| 2.50 | 40.3                    | 78                           | 1.121                             |

Table S8: Experimental data on room temperature density  $\rho_{300}$  and glass transition temperature  $T_g$ . The values of  $T_g$  were taken from reference [1]. The density data were extracted from Fig. S18 using a graphical extraction tool [3]. The amine composition in pph was converted to an equivalent amine-to-epoxy ratio  $R$  using the relation,  $r = \frac{2M_E}{M_A} \frac{w_a}{w_e}$ , where  $M_E$  and  $M_A$  are the molecular weight of epoxy (375 g/mol) and amine respectively and  $\frac{w_a}{w_e}$  is the amine-to-epoxy weight ratio (pph amine)

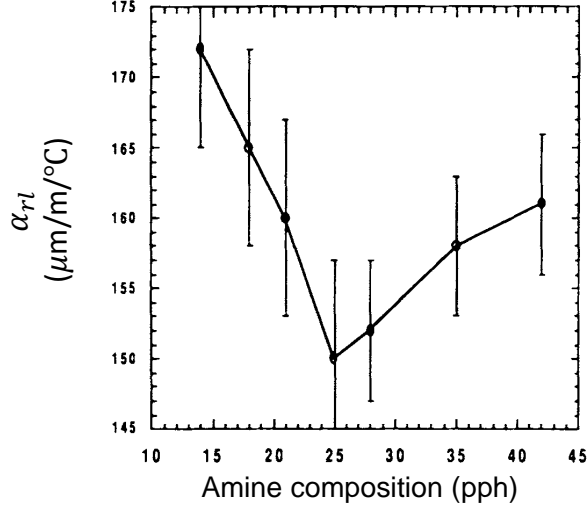

Figure S19: Experimental data on linear thermal expansion coefficient in the rubbery state  $\alpha_{rl}$  as a function of amine composition (reprinted here with permission from reference [2], copyright 1992 John Wiley & Sons).

| $R$  | Amine composition (pph) | $\alpha_{rl}$ $\mu\text{m}/\text{m}/^\circ\text{C}$ |
|------|-------------------------|-----------------------------------------------------|
| 0.5  | 14                      | 172                                                 |
| 0.64 | 18                      | 165.11                                              |
| 0.76 | 21.34                   | 160                                                 |
| 1    | 28.09                   | 152.06                                              |
| 1.26 | 35.43                   | 158                                                 |
| 1.66 | 46.64                   | 161                                                 |

Table S9: Experimental values of  $\alpha_{rl}$ . The data were extracted from Fig. S22 using a graphical extraction tool [3].

## S2 Regression models used for estimating missing properties from experimental data

The polynomial model that best fits  $\rho_{300}$  vs.  $R$  data (Table. S8) is given by,

$$\rho_{300}(R) = a_3R^3 + a_2R^2 + a_1R + a_0 \quad (14)$$

where  $a_3=-0.0073$ ,  $a_2=0.0462$ ,  $a_1=-0.1130$  and  $a_0=1.23$ .

The polynomial model that best fits  $T_g$  vs.  $R$  data (Table. S8) is given by,

$$T_g(R) = c_3R^3 + c_2R^2 + c_1R + c_0 \quad (15)$$

where  $c_3=0$ ,  $c_2=249.5525$ ,  $c_1=-180.9058$  and  $c_0=92.3534$  for  $R < 1$  and  $c_3=-30.3666$ ,  $c_2=183.1428$  and  $c_1=-400.3315$  and  $c_0=408.3625$  for  $R > 1$

The polynomial model that best fits  $\alpha_{rl}$  vs.  $R$  data (Table. S9) is given by,

$$\alpha_{rl}(R) = b_1R + b_0 \quad (16)$$

where  $b_1=-39.92$  and  $b_0=191.19$  for  $R < 1$  and  $b_1=-39.92$  and  $b_0=191.19$  for  $R > 1$

| $R$  | $\rho_{300}(\text{g}/\text{cm}^3)$ |      | $T_g(^{\circ}\text{C})$ |       | $\alpha_{rl} (\mu\text{m}/\text{m}/^{\circ}\text{C})$ |        |
|------|------------------------------------|------|-------------------------|-------|-------------------------------------------------------|--------|
|      | Sim.                               | Exp. | Sim.                    | Exp.  | Sim.                                                  | Exp.   |
| 0.4  | 1.1062±0.0018                      | 1.19 | 120.59±0.0036           | 60    | 220.67±4.24                                           | 175.2  |
| 0.67 | 1.1050±0.0014                      | 1.17 | 144±0.0046              | 83.17 | 173.63±7.17                                           | 164.44 |
| 1    | 1.1040±0.0065                      | 1.15 | 189.71±0.0261           | 161   | 90±21                                                 | 152.06 |
| 2    | 1.0784±0.0011                      | 1.13 | 161.64±0.0035           | 97.34 | 177±6.14                                              | 166.19 |
| 3    | 1.0640±0.0025                      | 1.10 | 137.70±0.0067           | 35.75 | 189.74±15.13                                          | 179.53 |

Table S10: Comparison of material properties determined from MD simulations (Sim.) and experimental data (Exp.) from literature. The experimental values of material properties of off-stoichiometric systems ( $R \neq 1$ ) were obtained (estimated) using regression models.

| System   | $T_g^{exp*}(^{\circ}\text{C})$ | $T_g^{WLF}(^{\circ}\text{C})$ | $T_g^{heuristic}(^{\circ}\text{C})$ |
|----------|--------------------------------|-------------------------------|-------------------------------------|
| $R=0.4$  | 60                             | 33                            | 66-88                               |
| $R=0.67$ | 83.17                          | 56                            | 89-11                               |
| $R=1$    | 161                            | 102                           | 135-157                             |
| $R=2$    | 97.34                          | 74                            | 107-129                             |
| $R=3$    | 35.75                          | 50                            | 83-105                              |

Table S11: The adjusted values of  $T_g$  based on shift estimated using WLF equation,  $T_g^{WLF}$  and heuristic approach,  $T_g^{heuristic}$  and the estimated experimental values of  $T_g$  calculated from regression model,  $T_g^{exp*}$  (same as in Table. S10, listed here for ease of comparison)

| $R$  | $w_{Def}$     | $w_{sol}$     | $\phi_{Def}$ at 300 K |
|------|---------------|---------------|-----------------------|
| 0.4  | 0.7420±0.0094 | 0.3274±0.0094 | 0.7450±0.0088         |
| 0.67 | 0.4417±0.0051 | 0.1122±0.0051 | 0.4459±0.0048         |
| 1    | 0             | 0             | 0                     |
| 2    | 0.3321±0.0081 | 0.0442±0.0063 | 0.3690±0.0083         |
| 3    | 0.4688±0.0005 | 0.1050±0.0089 | 0.5147±0.0007         |

Table S12: Volume fraction of defects,  $\phi_{Def}$  at 300 K, weight fraction of defects,  $w_{Def}$  and weight fraction of sols,  $w_{sol}$ .

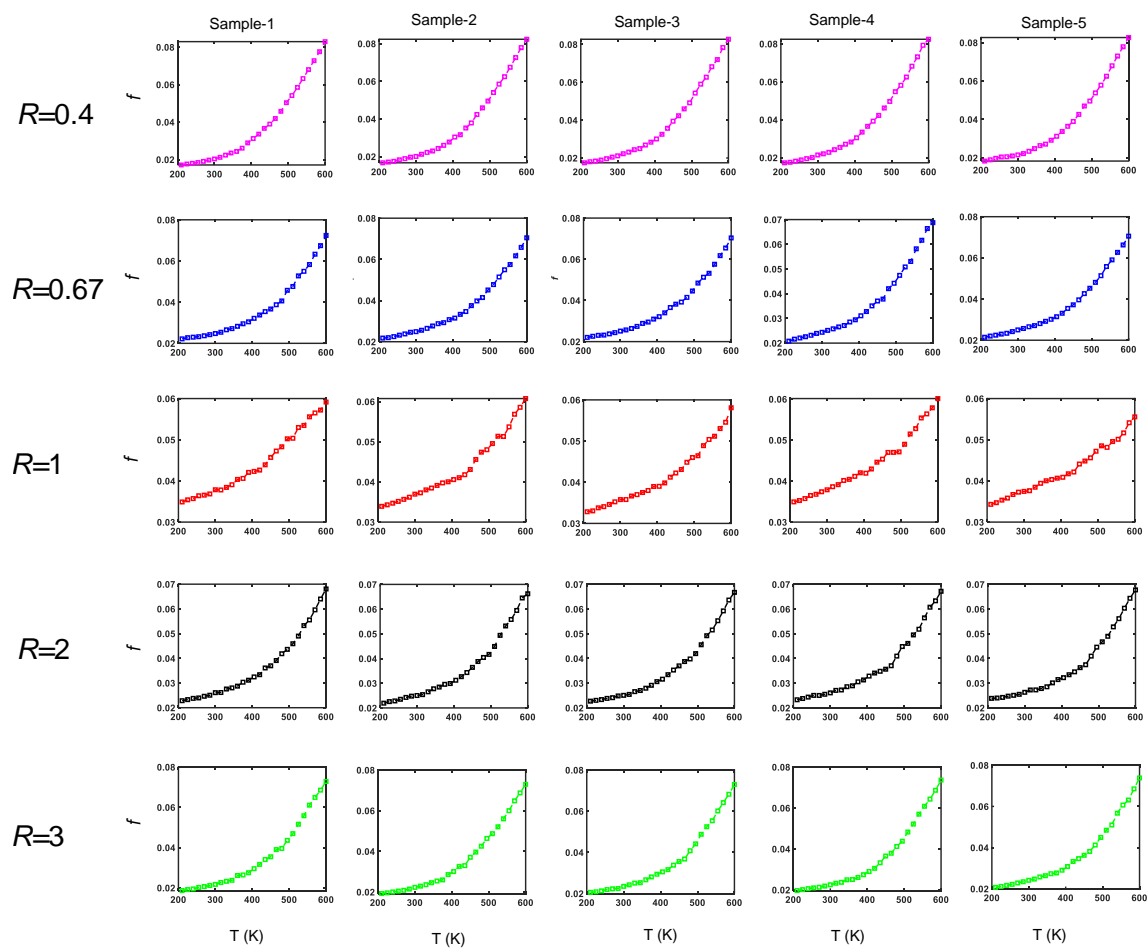

Figure S20: Fractional free volume as a function of temperature for the systems studied.

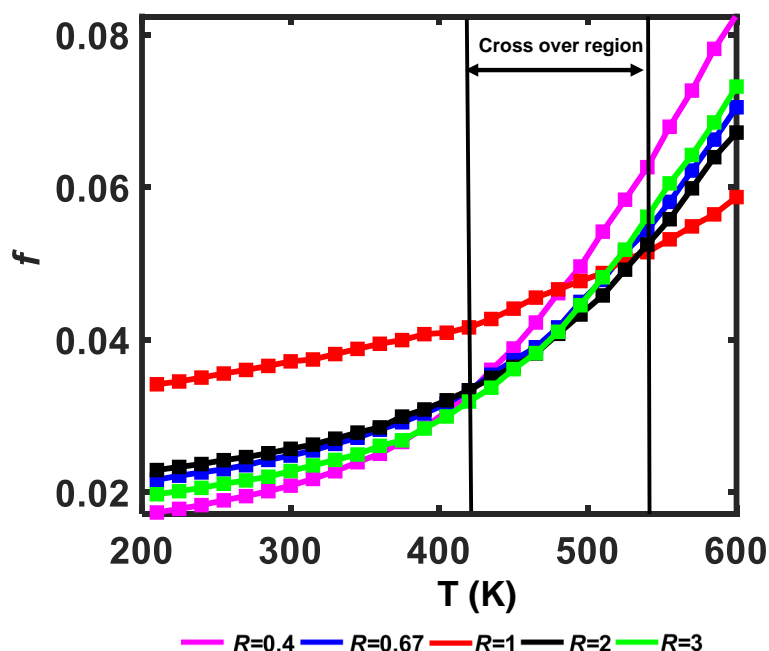

Figure S21: Average fractional free volume as a function of temperature for the systems studied. The temperature range over which crossover in the trend i.e., increase in fractional volume to decrease in fractional volume, for deviations from  $R=1$ , occurs is shown.

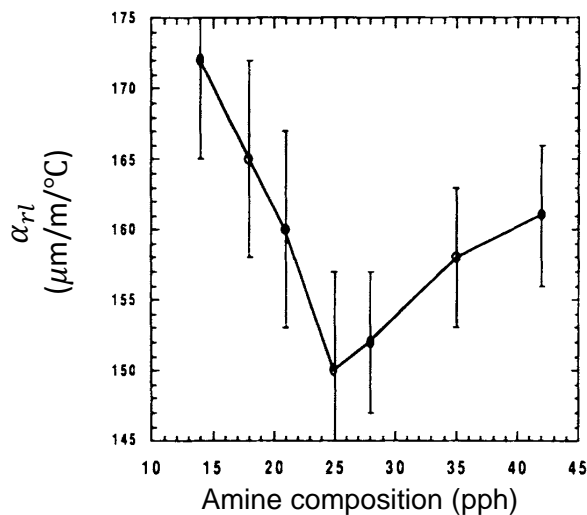

Figure S22: Experimental data on linear thermal expansion coefficient in the rubbery state  $\alpha_{rl}$  as a function of amine composition (reprinted here with permission from reference [2], copyright 1992 John Wiley & Sons).

### S3 Data availability

The LAMMPS data files of the systems and description on how to visualize the monomer types and crosslinks (C-N bonds) can be found in a zipped folder which can be downloaded via the link provided below. The folder also contains mol2 files of epoxy and amine which contain the partial charges. More data can be provided on reasonable request.

[https://www.dropbox.com/s/aeelijgcw3tdf8d/SI\\_DGEBAPACM.zip?dl=0](https://www.dropbox.com/s/aeelijgcw3tdf8d/SI_DGEBAPACM.zip?dl=0)

## References

- [1] M. R. Vanlandingham, R. F. Eduljee, and J. W. Gillespie Jr. Relationships between stoichiometry, microstructure, and properties for amine-cured epoxies. *Journal of Applied Polymer Science*, 71(5):699–712, 1999.
- [2] G. R. Palmese and R. L. McCullough. Effect of epoxy–amine stoichiometry on cured resin material properties. *Journal of Applied Polymer Science*, 46(10):1863–1873, 1992.
- [3] Ankit Rohatgi. Webplotdigitizer: Version 4.2, 2019.
- [4] Lowell M. Schwartz and Robert I. Gelb. Statistical uncertainties of end points at intersecting straight lines. *Anal. Chem.*, 56(8):1487–1492, 1984.
- [5] Julia Martin, Gabriel Delgado Martin, and Agustin G. Asuero. Intersecting straight lines: Titrimetric applications. In Vu Dang Hoang, editor, *Advances in Titration Techniques*, chapter 3. IntechOpen, Rijeka, 2017.
